# Supplementary material for: The effect of noble metal (Au, Pd and Pt) nanoparticles on the gas sensing performance of SnO2-based sensors: a case study on the {221} high-index faceted SnO2octahedra
Source: Royal Society of Chemistry journal article supplement (doi:10.1039/c5ce01162k), 2015-01-01
Supplement: c5ce01162k1.pdf [file c5ce01162k1.pdf]

## Electronic Supplementary Information

### The effect of noble metal (Au, Pd, Pt) nanoparticles on the gas sensing performance of SnO<sub>2</sub>-based sensors: a case study on the {221} high-index faceted SnO<sub>2</sub> octahedra

Chang Liu, Qin Kuang,\* Zhaoxiong Xie, and Lansun Zheng

State Key Laboratory of Physical Chemistry of Solid Surfaces, Collaborative Innovation Center of Chemistry for Energy Materials, and Department of Chemistry College of Chemistry, Chemical Engineering, Xiamen University, Xiamen 361005  
E-mail: qkuang@xmu.edu.cn

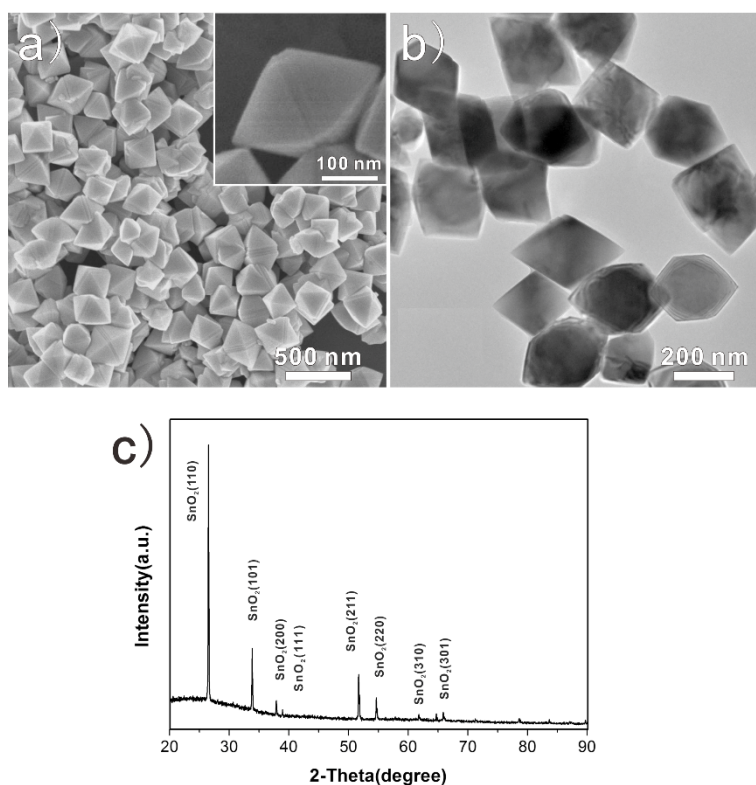

**Fig. S1** (a) SEM image, (b) TEM image and (c) XRD patterns of {221} faceted SnO<sub>2</sub> octahedral NCs.

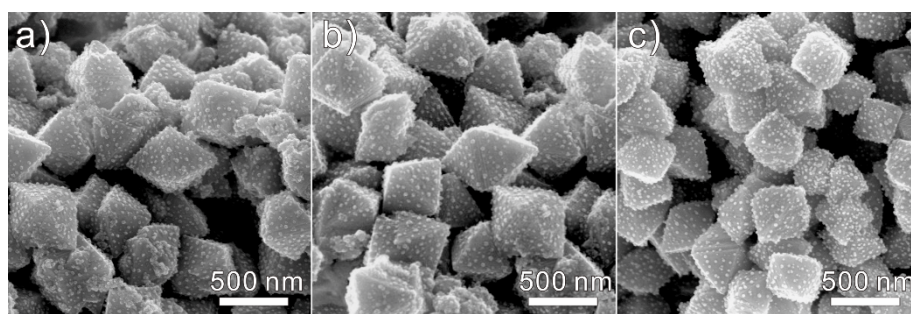

**Fig. S2** SEM images of SnO<sub>2</sub>/Au, (b) SnO<sub>2</sub>/Pd, and (c) SnO<sub>2</sub>/Pt.

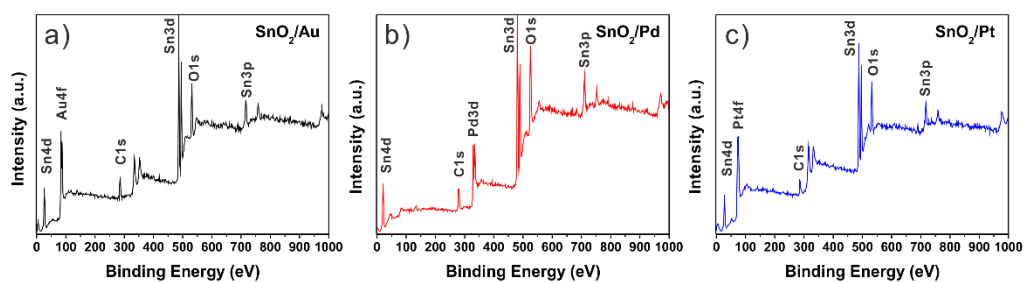

**Fig. S3** XPS survey spectra of (a) SnO<sub>2</sub>/Au, (b) SnO<sub>2</sub>/Pd, and (c) SnO<sub>2</sub>/Pt.
